# Supplementary material
Source: HighWire-hosted journal article supplement (https://jnm.snmjournals.org/highwire/filestream/110368/field_highwire_adjunct_files/0/264872_Supplemental_Data.pdf)
Supplement: 264872_Supplemental_Data.pdf [file 264872_Supplemental_Data.pdf]

| <b>Characteristic</b>                         | <b>Mean [IQR]</b> | <b>N (%)</b> |
|-----------------------------------------------|-------------------|--------------|
| <b>Gender</b>                                 |                   |              |
| Male                                          |                   | 5 (45)       |
| Female                                        |                   | 6 (55)       |
| <b>Age (years)</b>                            | 44 [34-54]        |              |
| <b>Indication for PET/CT</b>                  |                   |              |
| Sarcoma (SFT)                                 |                   | 2 (18)       |
| Ovarian carcinoma                             |                   | 1 (9)        |
| Pleomorphic sarcoma                           |                   | 1 (9)        |
| Sarcoma                                       |                   | 1 (9)        |
| Colorectal carcinoma                          |                   | 1 (9)        |
| Breast carcinoma                              |                   | 1 (9)        |
| Prostate carcinoma                            |                   | 1 (9)        |
| Lung carcinoma                                |                   | 1 (9)        |
| Urothelial carcinoma                          |                   | 1 (9)        |
| Myxofibrosarcoma                              |                   | 1 (9)        |
| <b>Type of mRNA vaccine</b>                   |                   |              |
| BNT162b2                                      |                   | 10 (91)      |
| mRNA1273                                      |                   | 1 (9)        |
| <b>Time between vaccine and PET/CT (days)</b> |                   |              |
|                                               | 19 [8-30]         |              |
| <b>Concomitant tumor therapy at PET</b>       |                   |              |
| None                                          |                   | 6 (55)       |
| Radionuclide                                  |                   | 1 (9)        |
| Chemo                                         |                   | 2 (18)       |
| Immune                                        |                   | 3 (27)       |

**Supplemental Table 1.** Patient Characteristics (n=11)

| <b>Characteristic</b>     | <b>N (%)</b> |
|---------------------------|--------------|
| <b>Indication</b>         |              |
| Staging                   | 3 (27)       |
| Restaging                 | 8 (73)       |
| <b>Extent</b>             |              |
| No disease                | 0 (0)        |
| Primary tumor only        | 3 (27)       |
| Locoregional disease only | 1 (9)        |
| Distant metastatic:       |              |
| nodal                     | 3 (27)       |
| bone                      | 1 (9)        |
| organ                     | 5 (45)       |

**Supplemental Table 2.** Tumor stage by combined <sup>18</sup>F-FDG and <sup>68</sup>Ga-FAPI PET/CT in 11 patients

| Patient No.                    | Tumor               |                     |                       | Injection site      |                       | Axillary & Adjacent Nodes |    |               |                       |   |               | Distant Nodes, Spleen, BM |                       |
|--------------------------------|---------------------|---------------------|-----------------------|---------------------|-----------------------|---------------------------|----|---------------|-----------------------|---|---------------|---------------------------|-----------------------|
|                                | Entity              | SUVpeak             |                       | <sup>18</sup> F-FDG | <sup>68</sup> Ga-FAPI | <sup>18</sup> F-FDG       |    |               | <sup>68</sup> Ga-FAPI |   |               | <sup>18</sup> F-FDG       | <sup>68</sup> Ga-FAPI |
|                                |                     | <sup>18</sup> F-FDG | <sup>68</sup> Ga-FAPI |                     |                       | visual                    | N  | SUVpeak       | visual                | N | SUVpeak       |                           |                       |
| 1                              | Ovarian             | 4.1                 | 4.7                   | positive            | negative              | positive                  | 12 | 2.2           | negative              | 0 | 0.7           | negative                  | negative              |
| 2                              | Sarcoma (SFT)       | 3.3                 | 11.7                  | positive            | negative              | positive                  | 4  | 2.1           | negative              | 0 | 0.7           | negative                  | negative              |
| 3                              | Pleomorphic sarcoma | 3.9                 | 1.8                   | positive            | negative              | positive                  | 12 | 4.8           | negative              | 0 | 0.5           | positive*                 | negative              |
| 4                              | Sarcoma             | 1.0                 | 2.5                   | positive            | negative              | positive                  | 2  | 2.7           | negative              | 0 | 0.7           | negative                  | negative              |
| 5                              | Colorectal          | 3.8                 | 6.0                   | positive            | negative              | positive                  | 12 | 9.1           | negative              | 0 | 1.5           | negative                  | negative              |
| 6                              | Sarcoma (SFT)       | 4.4                 | 8.1                   | positive            | negative              | positive                  | 8  | 6.6           | negative              | 0 | 1.1           | negative                  | negative              |
| 7                              | Breast              | 2.1                 | 4.0                   | positive            | negative              | positive                  | 1  | 1.5           | negative              | 0 | 0.9           | negative                  | negative              |
| 8                              | Prostate            | 10.1                | 12.0                  | positive            | negative              | positive                  | 2  | 2.9           | negative              | 0 | 0.4           | negative                  | negative              |
| 9                              | Lung                | 20.2                | 18.8                  | positive            | negative              | positive                  | 5  | 1.9           | negative              | 0 | 0.9           | negative                  | negative              |
| 10                             | Urothelial          | 7.1                 | 5.3                   | positive            | negative              | positive                  | 12 | 3.4           | negative              | 0 | 0.9           | negative                  | negative              |
| 11                             | Myxofibrosarcoma    | 4.4                 | 4.0                   | positive            | negative              | positive                  | 4  | 1.6           | negative              | 0 | 0.7           | negative                  | negative              |
| <b>Sum (%) or Median [IQR]</b> | -                   | 4.1 [0-9.4]         | 5.3 [0.2-10.4]        | 11 (100%)           | 0 (0%)                | 11 (100%)                 | 74 | 2.7 [1.1-5.9] | 0 (0%)                | 0 | 0.7 [0.4-1.0] | 1 (9%)                    | 0 (0%)                |

### Supplemental Table 3. Non-tumor specific uptake

\*Diffuse bone marrow uptake - SUVpeak 3.4

|                                   | <b>overall<br/>detection<br/>N</b> | <b><sup>18</sup>F-FDG<br/>N (%)</b> | <b><sup>68</sup>Ga-FAPI<br/>N (%)</b> |
|-----------------------------------|------------------------------------|-------------------------------------|---------------------------------------|
| Patient level detection of tumor  | 11                                 | 11 (100)                            | 11 (100)                              |
| Total N of detected tumor lesions | 102                                | 74 (73)                             | 96 (94)                               |
| Primary lesion                    | 6                                  | 6 (100)                             | 6 (100)                               |
| Local nodal                       | 26                                 | 20 (77)                             | 21 (81)                               |
| Distant nodal                     | 10                                 | 8 (80)                              | 10 (100)                              |
| Lung                              | 7                                  | 5 (71)                              | 7 (100)                               |
| Liver                             | 18                                 | 9 (50)                              | 17 (94)                               |
| Bone                              | 28                                 | 23 (82)                             | 28 (100)                              |
| Other                             | 7                                  | 3 (43)                              | 7 (100)                               |

**Supplemental Table 4.** Tumor detection efficacy for <sup>18</sup>F-FDG vs. <sup>68</sup>Ga-FAPI PET/CT (n=11 patients)

## Supplemental Figure 1-11. $^{18}\text{F}$ -FDG PET/CT and $^{68}\text{Ga}$ -FAPI PET/CT images in all 11 patients

$^{18}\text{F}$ -FDG (A-D) and  $^{68}\text{Ga}$ -FAPI (E-H) Maximum intensity projection images (MIP) of the PET/CT scan (A, H), axial CT (B, E), PET (C, F), PET/CT (D, G) are shown.

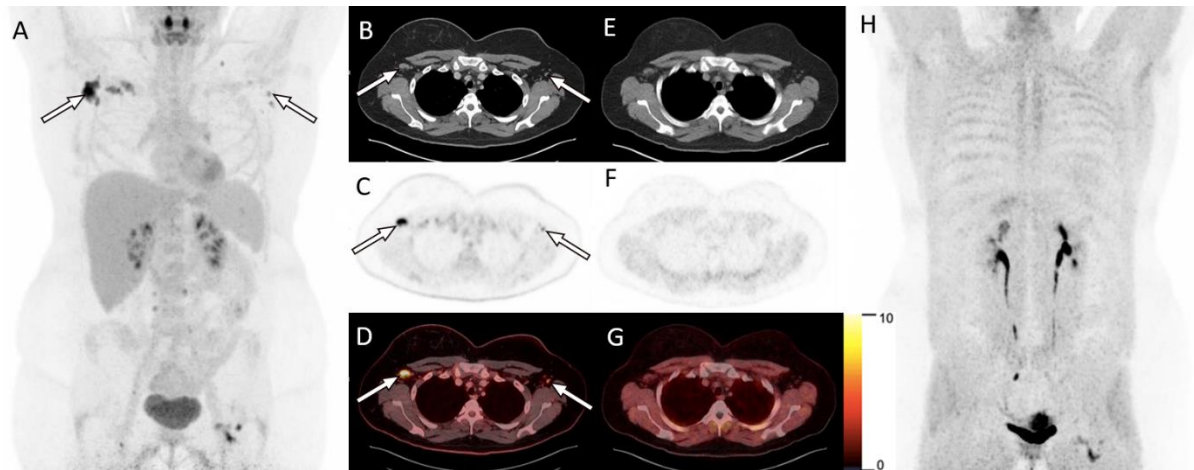

### Supplemental Figure 1. Patient 1, female, 32 y

Tumor stage: Colorectal cancer, R0 resection with locoregional and distant metastases.

PET uptake in the vaccination region:  $^{18}\text{F}$ -FDG positive (n=12 lymph nodes, arrow) vs.  $^{68}\text{Ga}$ -FAPI negative (bilateral findings after vaccination on right side followed by a biopsy confirming reactive lymphoid hyperplasia)

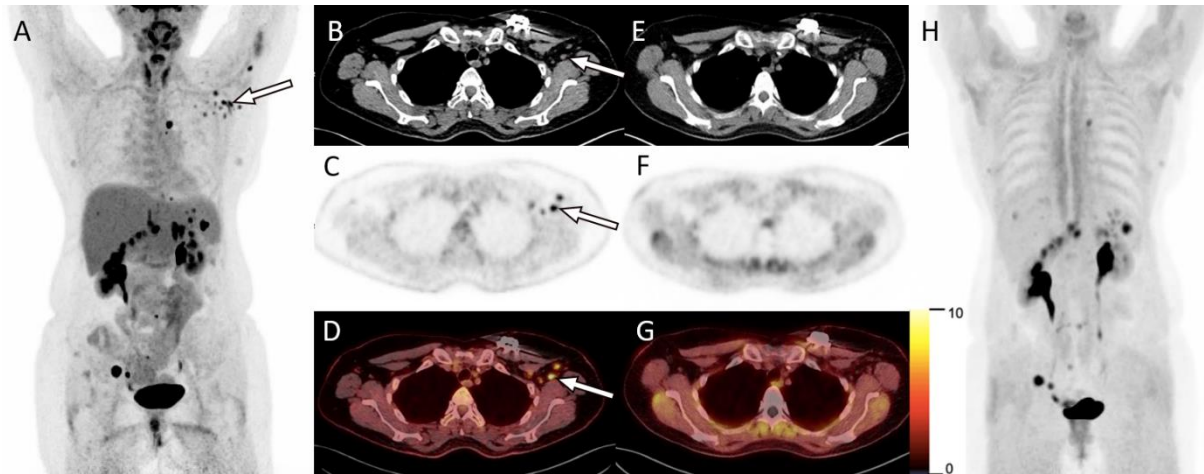

**Supplemental Figure 2.1.** Patient 2, female, 49 y

Tumor stage: Ovarian cancer, R0 resection with locoregional and distant metastases.

PET uptake in the vaccination region:  $^{18}\text{F}$ -FDG positive (n=12 lymph nodes, arrow) vs.  $^{68}\text{Ga}$ -FAPI negative

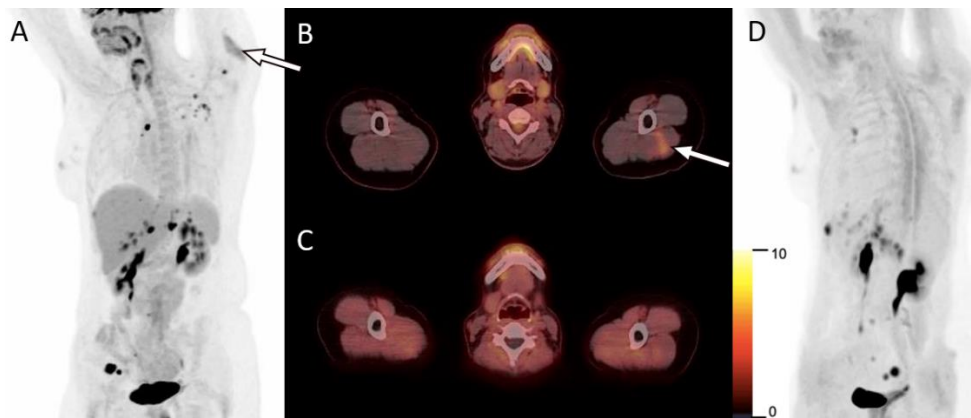

**Supplemental Figure 2.2.**

Same patient showing additional deltoid muscle uptake on  $^{18}\text{F}$ -FDG<sup>18</sup> ( $\text{SUV}_{\text{peak}}$  2.3, arrow).

$^{18}\text{F}$ -FDG (A, B) and  $^{68}\text{Ga}$ -FAPI (C, D), MIP (A, D), PET/CT (B, C)

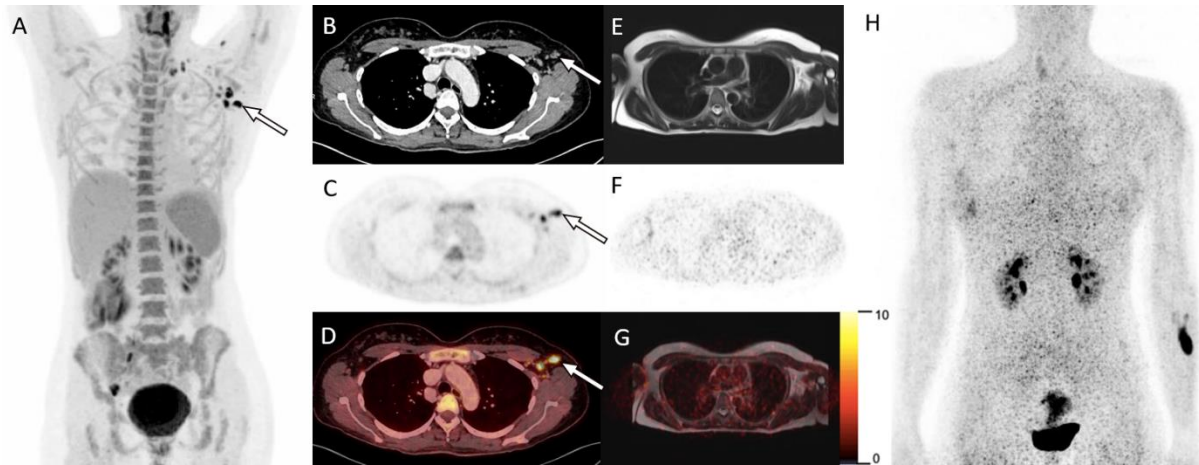

**Supplemental Figure 3.** Patient 3, female, 42 y

Tumor stage: Undifferentiated pleomorphic sarcoma (UPS), primary lesion with one locoregional metastasis.

PET uptake in the vaccination region:  $^{18}\text{F}$ -FDG positive (n=11 lymph nodes, arrow) vs.  $^{68}\text{Ga}$ -FAPI negative

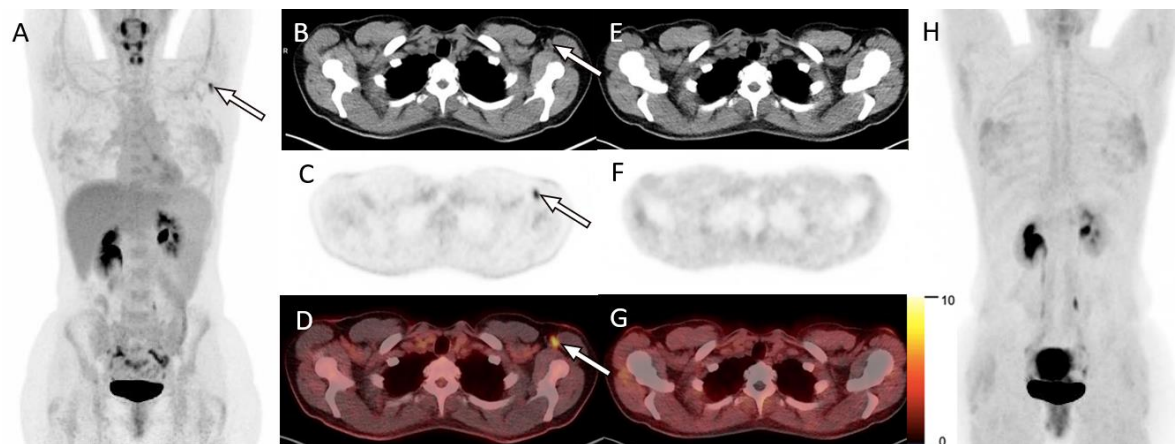

**Supplemental Figure 4.** Patient 4, female, 39 y

Tumor stage: Low grade myxoid liposarcoma, primary lesion with no metastases.

PET uptake in the vaccination region:  $^{18}\text{F}$ -FDG positive (n=2 lymph nodes, arrow) vs.  $^{68}\text{Ga}$ -FAPI negative

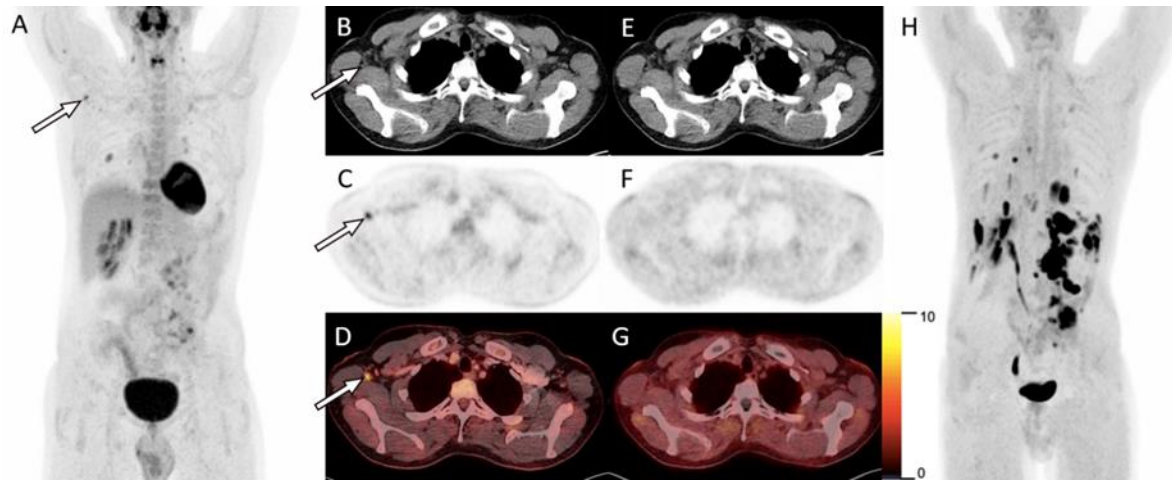

**Supplemental Figure 5.** Patient 5, male, 36 y

Tumor stage: Solitary fibrous tumor, R0 resection with locoregional and distant metastases.

PET uptake in the vaccination region:  $^{18}\text{F}$ -FDG positive (n=4 lymph nodes, arrow) vs.  $^{68}\text{Ga}$ -FAPI negative

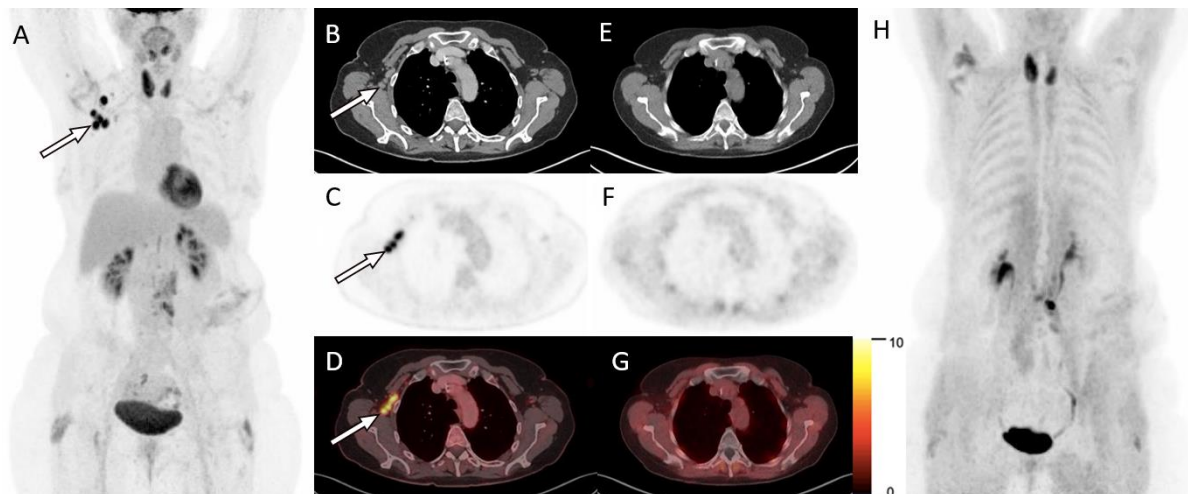

**Supplemental Figure 6.** Patient 6, female, 57 y

Tumor stage: Solitary fibrous tumor, primary lesion with no metastases.



PET uptake in the vaccination region:  $^{18}\text{F}$ -FDG positive (n=8 lymph nodes, arrow) vs.  $^{68}\text{Ga}$ -FAPI negative

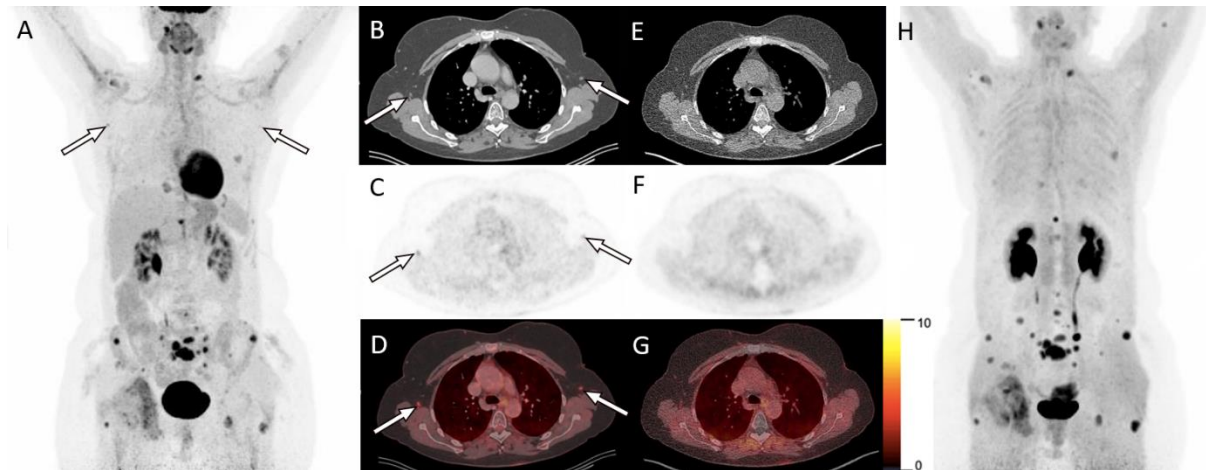

**Supplemental Figure 7.** Patient 7, female, 44 y

Tumor stage: Breast cancer, prior lumpectomy, bone metastases.

PET uptake in the vaccination region:  $^{18}\text{F}$ -FDG positive (n=2 lymph nodes, arrow) vs.  $^{68}\text{Ga}$ -FAPI negative

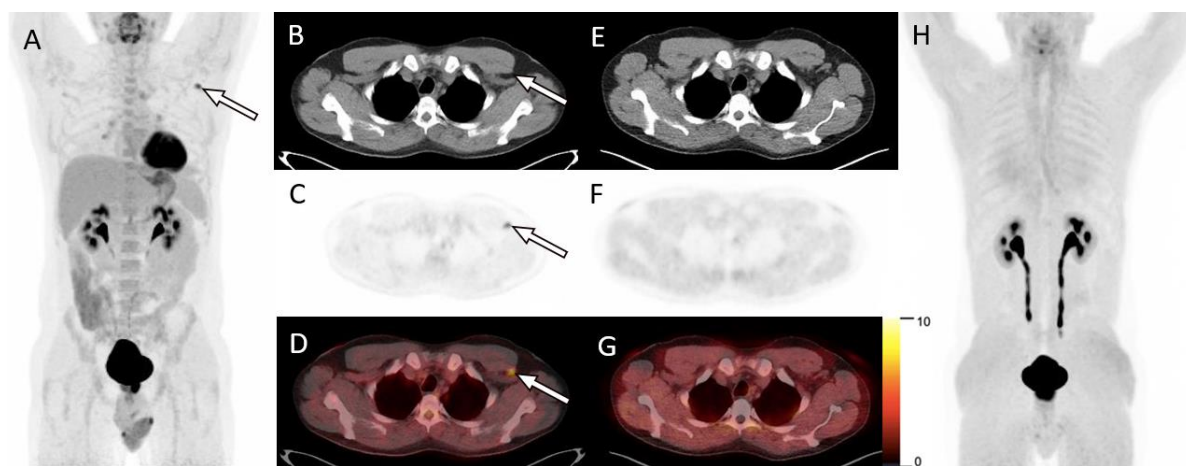

**Supplemental Figure 8.** Patient 8, male, 47 y

Tumor stage: Prostate cancer, primary lesion with no metastases.

PET uptake in the vaccination region:  $^{18}\text{F}$ -FDG positive (n=2 lymph nodes, arrow) vs.  $^{68}\text{Ga}$ -FAPI negative

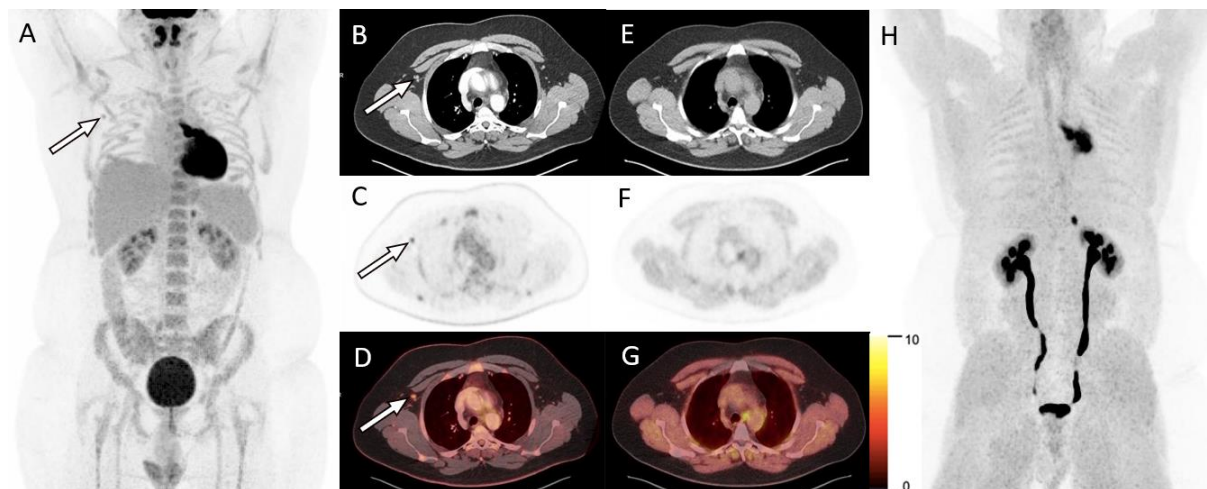

**Supplemental Figure 9.** Patient 9, male, 39 y

Tumor stage: Lung cancer, primary lesions with one distant metastasis.

PET uptake in the vaccination region:  $^{18}\text{F}$ -FDG positive (n=5 lymph nodes, arrow) vs.  $^{68}\text{Ga}$ -FAPI negative

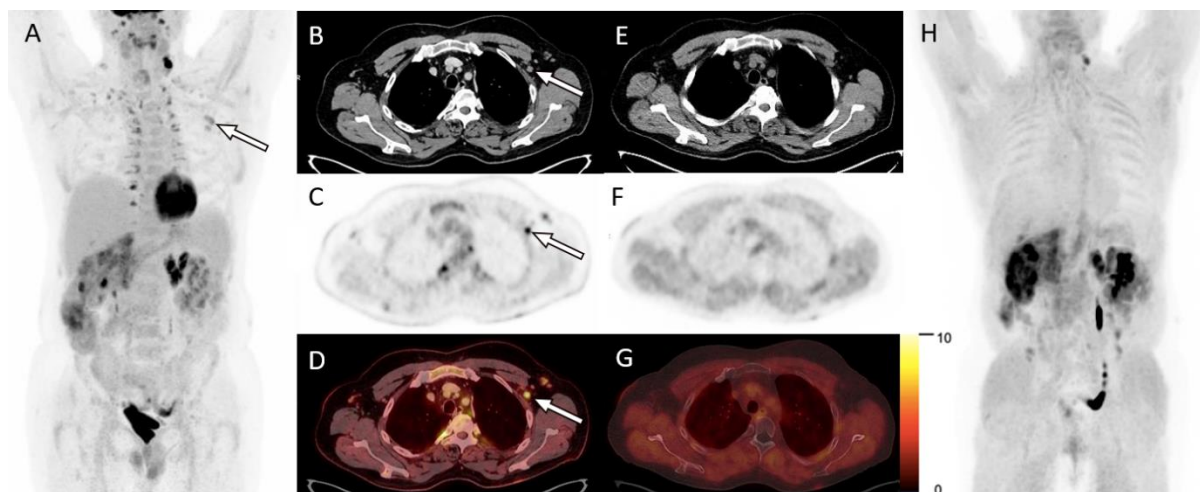

**Supplemental Figure 10.** Patient 10, male, 47 y

Tumor stage: Urothelial cancer, primary lesion with locoregional and distant metastases.

PET uptake in the vaccination region:  $^{18}\text{F}$ -FDG positive (n=12 lymph nodes, arrow) vs.  $^{68}\text{Ga}$ -FAPI negative

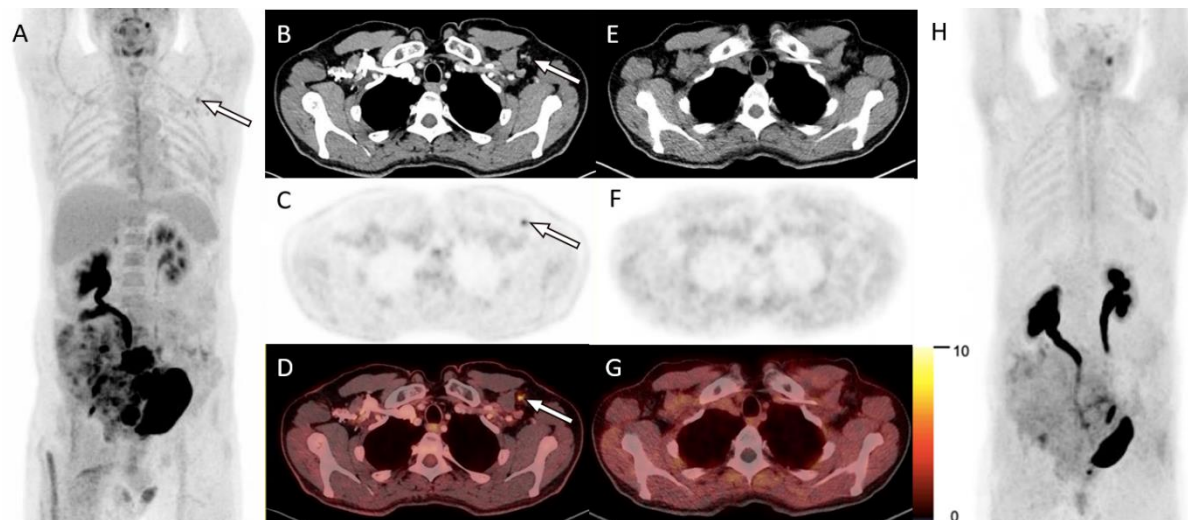

**Supplemental Figure 11.** Patient 11, male, 62 y

Tumor stage: Myxofibrosarcoma, primary lesion, left gynecomastia with no metastases.

PET uptake in the vaccination region:  $^{18}\text{F}$ -FDG positive (n=4 lymph nodes, arrow) vs.  $^{68}\text{Ga}$ -FAPI negative
